# Supplementary material for: Dual Control of Host Actin Polymerization by a Legionella Effector Pair
Source: Hindawi journal article supplement (doi:10.1155/2024/8896219), 2024-01-27
Supplement: f1 [file 8896219.f1.zip]

Archive with 2 entries (2 files):
- Supp_S8_Mass_Spec_results.xlsx
- supplemental 20240125.pdf
