# Supplementary material for: Dual Control of Host Actin Polymerization by a Legionella Effector Pair
Source: Hindawi journal article supplement (doi:10.1155/2024/8896219), 2024-01-27
Supplement: f1 [file 8896219.f1.zip › Supp_S8_Mass_Spec_results.xlsx]

## Sheet: MassSpec extract
Protein FDR Confidence: Combined	Master	Accession	Description	Contaminant	Sum PEP Score	Coverage [%]	# Peptides	# PSMs	# Unique Peptides	# AAs	MW [kDa]	calc. pI	Score Sequest HT: Sequest HT	# Peptides (by Search Engine): Sequest HT	Abundance Ratio: (Pool) / (t3)	Abundance Ratio: (t1) / (t3)	Abundance Ratio: (t2) / (t3)	Abundance Ratio: (t4) / (t3)	Abundance Ratio: (t5) / (t3)	Abundance Ratio (log2): (Pool) / (t3)	Abundance Ratio (log2): (t1) / (t3)	Abundance Ratio (log2): (t2) / (t3)	Abundance Ratio (log2): (t4) / (t3)	Abundance Ratio (log2): (t5) / (t3)	Abundance Ratio P-Value: (Pool) / (t3)	Abundance Ratio P-Value: (t1) / (t3)	Abundance Ratio P-Value: (t2) / (t3)	Abundance Ratio P-Value: (t4) / (t3)	Abundance Ratio P-Value: (t5) / (t3)	Abundance Ratio Adj. P-Value: (Pool) / (t3)	Abundance Ratio Adj. P-Value: (t1) / (t3)	Abundance Ratio Adj. P-Value: (t2) / (t3)	Abundance Ratio Adj. P-Value: (t4) / (t3)	Abundance Ratio Adj. P-Value: (t5) / (t3)	Abundances (Grouped): Pool	Abundances (Grouped): t1	Abundances (Grouped): t2	Abundances (Grouped): t3	Abundances (Grouped): t4	Abundances (Grouped): t5	Abundances (Normalized): F1: 134N, Control, Pool	Abundances (Normalized): F1: 126, Sample, t1	Abundances (Normalized): F1: 129N, Sample, t1	Abundances (Normalized): F1: 131C, Sample, t1	Abundances (Normalized): F1: 127N, Sample, t2	Abundances (Normalized): F1: 129C, Sample, t2	Abundances (Normalized): F1: 132N, Sample, t2	Abundances (Normalized): F1: 127C, Sample, t3	Abundances (Normalized): F1: 130N, Sample, t3
High	Master Protein	lcl	[gene=vipA] [locus_tag=LPP_RS02270] [protein=Dot/Icm T4SS effector VipA] [protein_id=WP_025519277.1] [location=complement(505023..506081)] [gbkey=CDS]	FALSE	75.329	39	13	48	13	352	39.5	6.55	176.27	13	0.931	0.375	0.602	1.555	0.742	-0.1	-1.41	-0.73	0.64	-0.43	0.694601	1.54093e-05	1.75425e-07	0.040149	0.656997	0.981299	0.00089963	1.24364e-05	0.241858	0.992911	35689.4	16234.4	25286.8	38056.8	60127.6	28577.3	35689.4	14003.9	20524.7	16234.4	24066.3	25822.2	25286.8	37149	39578.1
	Confidence	Sequence	Modifications	Contaminant	Qvality PEP	Qvality q-value	# Protein Groups	# Proteins	# PSMs	Master Protein Accessions	# Missed Cleavages	Theo. MH+ [Da]	Abundance Ratio: (Pool) / (t3)	Abundance Ratio: (t1) / (t3)	Abundance Ratio: (t2) / (t3)	Abundance Ratio: (t4) / (t3)	Abundance Ratio: (t5) / (t3)	Abundance Ratio (log2): (Pool) / (t3)	Abundance Ratio (log2): (t1) / (t3)	Abundance Ratio (log2): (t2) / (t3)	Abundance Ratio (log2): (t4) / (t3)	Abundance Ratio (log2): (t5) / (t3)	Abundance Ratio P-Value: (Pool) / (t3)	Abundance Ratio P-Value: (t1) / (t3)	Abundance Ratio P-Value: (t2) / (t3)	Abundance Ratio P-Value: (t4) / (t3)	Abundance Ratio P-Value: (t5) / (t3)	Abundance Ratio Adj. P-Value: (Pool) / (t3)	Abundance Ratio Adj. P-Value: (t1) / (t3)	Abundance Ratio Adj. P-Value: (t2) / (t3)	Abundance Ratio Adj. P-Value: (t4) / (t3)	Abundance Ratio Adj. P-Value: (t5) / (t3)	Abundances (Grouped): Pool	Abundances (Grouped): t1	Abundances (Grouped): t2	Abundances (Grouped): t3	Abundances (Grouped): t4	Abundances (Grouped): t5	Abundances (Grouped) CV [%]: Pool	Abundances (Grouped) CV [%]: t1	Abundances (Grouped) CV [%]: t2	Abundances (Grouped) CV [%]: t3	Abundances (Grouped) CV [%]: t4	Abundances (Grouped) CV [%]: t5	Abundances (Normalized): F1: 134N, Control, Pool	Abundances (Normalized): F1: 126, Sample, t1	Abundances (Normalized): F1: 129N, Sample, t1	Abundances (Normalized): F1: 131C, Sample, t1	Abundances (Normalized): F1: 127N, Sample, t2
	High	ANATEVDSLK	1xTMTpro [K10]; 1xTMTpro [N-Term]	FALSE	4.67405e-05	6.46784e-05	1	2	1	lcl	0	1655.95	0.884	0.316	0.627	1.454	0.742	-0.18	-1.66	-0.67	0.54	-0.43	0.666506	2.88238e-06	0.00360084	0.13298	0.913417	0.999959	0.000334899	0.0775328	0.609341	0.999964	283.4	101.4	201	320.5	466	238.4		19.95	15.14	4.1	6.6	5.1	283.4	95	136.1	101.4	201
	High	DQVSAEK	1xTMTpro [K7]; 1xTMTpro [N-Term]	FALSE	0.00308396	0.000340342	1	2	2	lcl	0	1384.79	0.953	0.243	0.526	1.588	0.684	-0.07	-2.04	-0.93	0.67	-0.55	0.849197	2.01706e-07	6.11525e-06	0.1032	0.784573	0.999959	4.01014e-05	0.000604531	0.538777	0.999964	2213.6	564.3	1256.5	2322.1	3774.8	1597.5		45.95	2.81	5.72	3.31	14.72	2213.6	381.5	950.3	564.3	1200
	High	EDVSIK	1xTMTpro [K6]; 1xTMTpro [N-Term]	FALSE	0.00973049	0.000764813	1	2	4	lcl	0	1298.78	0.994	0.328	0.584	1.583	0.827	-0.01	-1.61	-0.78	0.66	-0.27	0.98977	0.000224125	0.000333963	0.0948006	0.9505	0.999959	0.00928302	0.0138324	0.517786	0.999964	3000.3	988.6	1802.2	3017.2	5012.1	2721.9		30.47	2.87	6.38	3.03	8.27	3000.3	831.5	1473.3	988.6	1757.1
	High	ENSCSVAPVSK	1xCarbamidomethyl [C4]; 1xTMTpro [K11]; 1xTMTpro [N-Term]	FALSE	3.6519e-06	6.46784e-05	1	2	4	lcl	0	1785.97	1.008	0.363	0.618	1.537	0.629	0.01	-1.46	-0.69	0.62	-0.67	0.909071	0.000248557	0.000859097	0.119886	0.755321	0.999959	0.0101078	0.0280259	0.584184	0.999964	3395.4	1223.7	2086.3	3369.2	5239.9	2206.3		24.3	2.47	7.13	2.29	7.23	3395.4	935.5	1533.7	1223.7	2058.3
	High	EQNHEVINK	1xTMTpro [K9]; 1xTMTpro [N-Term]	FALSE	0.000304692	6.46784e-05	1	2	1	lcl	0	1718.97	0.931	0.302	0.592	1.725	0.88	-0.1	-1.73	-0.76	0.79	-0.18	0.766309	1.3531e-05	0.000845806	0.073861	0.949206	0.999959	0.00105725	0.0277759	0.447871	0.999964	801.2	259.7	509.3	860.7	1485	757.7		39.38	8.89	6.89	27.27	17.32	801.2	167.6	378.6	259.7	456.2
	High	EVTPAISQEPK	1xTMTpro [K11]; 1xTMTpro [N-Term]	FALSE	8.38788e-06	6.46784e-05	1	2	3	lcl	0	1807.05	0.979	0.361	0.599	1.507	0.691	-0.03	-1.47	-0.74	0.59	-0.53	0.963659	0.000506605	0.000849685	0.131372	0.856615	0.999959	0.0169751	0.0278451	0.607635	0.999964	2560.4	943.6	1603	2614.4	3992.7	1743.1		24.19	11.86	5.13	4.09	8.96	2560.4	711.8	1166.8	943.6	1315.4
	High	FFHELLEIIK	1xTMTpro [K10]; 1xTMTpro [N-Term]	FALSE	5.85726e-05	6.46784e-05	1	2	3	lcl	0	1897.14	1.294	0.481	0.767	2.278	0.967	0.37	-1.06	-0.38	1.19	-0.05	0.201652	0.0045771	0.0545359	0.00386798	0.787028	0.885119	0.0867995	0.439357	0.0647674	0.999964	1691	661.1	1121.5	1306.8	4270.8	1585.6		33.58	25.6	28.83	27.74	33.87	1691	497.1	965.5	661.1	1121.5
	High	IETVSSLSIPAVTESK	1xTMTpro [K16]; 1xTMTpro [N-Term]	FALSE	0.000164731	6.46784e-05	1	2	1	lcl	0	2269.31	0.985	0.445	0.599	1.601	1.09	-0.02	-1.17	-0.74	0.68	0.12	0.974459	0.00100734	0.00140114	0.0640124	0.560084	0.999959	0.0282353	0.0392341	0.410689	0.999964	345.5	156.1	210.1	350.9	608.8	363.3		36.13	21.23	9.41	10.54	9.28	345.5	156.1	234.3	114.6	210.1
	High	LFSEFVDNYAR	1xTMTpro [N-Term]	FALSE	1.06289e-05	6.46784e-05	1	2	9	lcl	0	1664.86	0.943	0.48	0.707	1.703	0.784	-0.08	-1.06	-0.5	0.77	-0.35	0.864577	0.00564897	0.00508524	0.0641467	0.941436	0.999959	0.100875	0.0981555	0.411242	0.999964	5256.8	2673.9	3746.9	5571.9	8803.2	4136.6		10.09	6.46	7.2	9.99	7.12	5256.8	2444.9	2987.8	2673.9	3746.9
	High	LVTQNQFLK	1xTMTpro [K9]; 1xTMTpro [N-Term]	FALSE	0.000124456	6.46784e-05	1	2	8	lcl	0	1699.04	0.937	0.647	0.829	1.419	0.726	-0.09	-0.63	-0.27	0.5	-0.46	0.822727	0.0849794	0.0944639	0.136887	0.731568	0.999959	0.552491	0.580042	0.617891	0.999964	7819.1	5403.8	6487.8	8348.2	11641.5	6063		12.22	4.95	4.37	6.34	12.1	7819.1	4911.3	6244.9	5403.8	6483.1
	High	TFADLNPQINNAR	1xTMTpro [N-Term]	FALSE	3.37788e-05	6.46784e-05	1	2	6	lcl	0	1777.95	0.854	0.398	0.609	1.525	0.715	-0.23	-1.33	-0.72	0.61	-0.48	0.607783	0.000210199	0.000388055	0.0907777	0.855595	0.999959	0.00887052	0.0154734	0.503954	0.999964	4239.2	1852.1	2978.8	4961.1	7202.4	3545		17.31	3.9	5.49	4.37	7.03	4239.2	1818.2	2445.6	1852.1	2978.8
	High	TNPYLLDCWISFITK	1xCarbamidomethyl [C8]; 1xTMTpro [K15]; 1xTMTpro [N-Term]	FALSE	1.96934e-05	6.46784e-05	1	2	3	lcl	0	2479.36	0.733	0.299	0.582	1.507	0.695	-0.45	-1.74	-0.78	0.59	-0.52	0.210238	7.82761e-05	0.000327027	0.135432	0.86275	0.898933	0.00409531	0.0136399	0.614536	0.999964	2116.3	862.2	1389.3	2886.5	4349.7	1812.6		32.24	14.2	15.61	22.6	17.4	2116.3	611.8	1181.2	862.2	1389.3
	High	VGPEGTPSER	1xTMTpro [N-Term]	FALSE	0.00280036	0.000273652	1	2	3	lcl	0	1332.71	0.859	0.256	0.542	1.541	0.746	-0.22	-1.97	-0.88	0.62	-0.42	0.544935	1.13551e-06	3.39408e-05	0.109383	0.91	0.999959	0.000159939	0.0024004	0.555072	0.999964	1967.2	585.5	1242.9	2291.1	3529.6	1708.7		31.47	5.96	1.35	9.21	14.62	1967.2	441.7	826.7	585.5	1148.6
High	Master Protein	lcl	[locus_tag=lpp0148] [db_xref=EnsemblGenomes-Gn:lpp0148,EnsemblGenomes-Tr:CAH11296,GOA:Q5X8U5,InterPro:IPR016103,UniProtKB/TrEMBL:Q5X8U5] [protein=RocC] [protein_id=CAH11296.1] [location=165251..165943] [gbkey=CDS]	FALSE	45.741	40	9	30	9	230	25.8	9.96	88.63	9	1.711	4.81	1.657	0.955	0.544	0.77	2.27	0.73	-0.07	-0.88	0.00922892	3.21903e-11	2.30277e-05	0.73484	0.455695	0.105893	2.12992e-08	0.0009142	0.999923	0.992911	21191.1	58956.4	20369.9	11848.4	11730.6	6903.3	21191.1	66709.9	55085.4	58956.4	20369.9	21684	20025.4	12988.9	11848.4
	Confidence	Sequence	Modifications	Contaminant	Qvality PEP	Qvality q-value	# Protein Groups	# Proteins	# PSMs	Master Protein Accessions	# Missed Cleavages	Theo. MH+ [Da]	Abundance Ratio: (Pool) / (t3)	Abundance Ratio: (t1) / (t3)	Abundance Ratio: (t2) / (t3)	Abundance Ratio: (t4) / (t3)	Abundance Ratio: (t5) / (t3)	Abundance Ratio (log2): (Pool) / (t3)	Abundance Ratio (log2): (t1) / (t3)	Abundance Ratio (log2): (t2) / (t3)	Abundance Ratio (log2): (t4) / (t3)	Abundance Ratio (log2): (t5) / (t3)	Abundance Ratio P-Value: (Pool) / (t3)	Abundance Ratio P-Value: (t1) / (t3)	Abundance Ratio P-Value: (t2) / (t3)	Abundance Ratio P-Value: (t4) / (t3)	Abundance Ratio P-Value: (t5) / (t3)	Abundance Ratio Adj. P-Value: (Pool) / (t3)	Abundance Ratio Adj. P-Value: (t1) / (t3)	Abundance Ratio Adj. P-Value: (t2) / (t3)	Abundance Ratio Adj. P-Value: (t4) / (t3)	Abundance Ratio Adj. P-Value: (t5) / (t3)	Abundances (Grouped): Pool	Abundances (Grouped): t1	Abundances (Grouped): t2	Abundances (Grouped): t3	Abundances (Grouped): t4	Abundances (Grouped): t5	Abundances (Grouped) CV [%]: Pool	Abundances (Grouped) CV [%]: t1	Abundances (Grouped) CV [%]: t2	Abundances (Grouped) CV [%]: t3	Abundances (Grouped) CV [%]: t4	Abundances (Grouped) CV [%]: t5	Abundances (Normalized): F1: 134N, Control, Pool	Abundances (Normalized): F1: 126, Sample, t1	Abundances (Normalized): F1: 129N, Sample, t1	Abundances (Normalized): F1: 131C, Sample, t1	Abundances (Normalized): F1: 127N, Sample, t2
	High	EAVVLFTR	1xTMTpro [N-Term]	FALSE	0.0100936	0.000764813	1	1	2	lcl	0	1238.74	1.921	5.357	1.796	1.038	0.449	0.94	2.42	0.84	0.05	-1.16	0.00273364	1.34246e-08	5.97263e-05	0.871041	0.252335	0.0539284	5.09872e-06	0.00367245	0.999999	0.999964	1160.8	3330.3	1129.5	604.2	724	311.1		18.81	7.58	14.88	27.37	16.56	1160.8	3972.4	2716.3	3330.3	1006.1
	High	KQVNAK	2xTMTpro [K1; K6]; 1xTMTpro [N-Term]	FALSE	0.210628	0.00819838	1	1	1	lcl	1	1600.04	0.962	1.541	0.973	1.054	1.065	-0.06	0.62	-0.04	0.08	0.09	0.886725	0.0873065	0.842208	0.900926	0.670985	0.999959	0.558718	0.999985	0.999999	0.999964	1133.1	1740.6	1145.9	1177.8	1241.2	1254.2		23.48	16.2	25.5	9.97	4.84	1133.1	1740.6	1689.7	2520.7	1145.9
	High	IGIMSDILQHAEK	1xTMTpro [K13]; 1xTMTpro [N-Term]	FALSE	0.0120533	0.000944137	1	1	1	lcl	0	2063.18
	High	QALHPR	1xTMTpro [N-Term]	FALSE	0.0552706	0.00401795	1	1	2	lcl	0	1025.62	1.601	4.2	1.548	0.848	0.515	0.68	2.07	0.63	-0.24	-0.96	0.0154685	5.11926e-08	0.00402279	0.470737	0.334321	0.20686	1.31039e-05	0.0838156	0.991963	0.999964	861.6	2256.8	871.3	538.1	456.2	277.3		9.82	6.65	8.99	23.57	23.69	861.6	2560.5	2116.4	2256.8	779.9
	High	QYDPDAVAR	1xTMTpro [N-Term]	FALSE	0.00149818	0.00013372	1	1	6	lcl	0	1338.7	1.827	6.193	1.925	0.811	0.33	0.87	2.63	0.94	-0.3	-1.6	0.00757766	2.66925e-10	7.43196e-06	0.447952	0.114968	0.120095	3.84571e-07	0.000714947	0.982298	0.999964	2386.8	7316.2	2514.3	1306.4	1059.8	430.7		13.1	1.25	13.78	35.29	25.87	2386.8	9015	7316.2	7168.9	2552.3
	High	RLDYLACLK	1xCarbamidomethyl [C7]; 1xTMTpro [K9]; 1xTMTpro [N-Term]	FALSE	0.000174995	6.46784e-05	1	1	5	lcl	1	1760.04	1.809	5.374	1.749	1.017	0.613	0.85	2.43	0.81	0.02	-0.7	0.0115868	8.43227e-10	9.61262e-05	0.91485	0.720453	0.166926	7.26887e-07	0.00537495	0.999999	0.999964	4959.9	13120.9	4797	2742.3	2790.2	1484		10.81	2.15	10.69	18.77	17.3	4959.9	15353.9	12558.5	13120.9	4852.2
	High	SDALLWLAANFPEAFDNSLR	1xTMTpro [N-Term]	FALSE	4.92539e-09	6.46784e-05	1	1	5	lcl	0	2554.33	1.66	4.85	1.621	1.001	0.52	0.73	2.28	0.7	0	-0.94	0.0393189	1.09084e-09	0.00114579	0.973491	0.501331	0.393695	8.65384e-07	0.0340524	0.999999	0.999964	2011.4	6339	1910.6	1211.9	1213.7	616.4		12.13	10.05	5.72	9.78	18.43	2011.4	6359.5	5102.8	6339	1904.1
	High	SPSVVVK	1xTMTpro [K7]; 1xTMTpro [N-Term]	FALSE	0.00298643	0.000340342	1	1	7	lcl	0	1323.85	1.948	5.561	1.83	0.91	0.5	0.96	2.48	0.87	-0.14	-1	0.00473015	2.8943e-10	1.81252e-06	0.804429	0.533209	0.0840483	3.84571e-07	0.000226793	0.999999	0.999964	8245.8	23476.3	7921.1	4234	3851.6	2117.5		8.83	4.69	5.48	28.07	16	8245.8	26888.9	22897.5	23476.3	7921.1
	High	SSTYASQNVAMQSAK	1xTMTpro [K15]; 1xTMTpro [N-Term]	FALSE	6.33406e-06	6.46784e-05	1	1	1	lcl	0	2181.15	1.633	3.011	1.094	1.049	1.527	0.71	1.59	0.13	0.07	0.61	0.0184946	1.9334e-05	0.557579	0.775608	0.256173	0.234864	0.00140627	0.999985	0.999999	0.999964	431.7	743.4	289.2	264.3	251.2	350.1		8.78	22.32	15.27	11.37	14.99	431.7	819.1	687.8	743.4	208.3
Normalized abundances
	OD1	OD1	OD1	OD2	OD2	OD2	OD3	OD3	OD3	OD4	OD4	OD4	OD5	OD5	OD5
	replicate 1	replicate 2	replicate 3	replicate 1	replicate 2	replicate 3	replicate 1	replicate 2	replicate 3	replicate 1	replicate 2	replicate 3	replicate 1	replicate 2	replicate 3
VipA	14003.9	20524.7	16234.4	24066.3	25822.2	25286.8	37149	39578.1	38056.8	60127.6	64759.8	55194.9	28577.3	24815.5	30931.6
RocC	66709.9	55085.4	58956.4	20369.9	21684	20025.4	12988.9	11848.4	11680.5	8705	11730.6	13303.7	8145.6	6903.3	6124.9
MEAN normalized abundance							SD normalized abundance
	OD1	OD2	OD3	OD4	OD5			OD1	OD2	OD3	OD4	OD5
VipA	16921	25058.4	38261.3	60027.4	28108.1		VipA	2706.01	734.806	1002.16	3905.5	2518.83
RocC	60250.6	20693.1	12172.6	11246.4	7057.93		RocC	4833.11	714.648	581.267	1908.37	832.162
Abundance Ratio (ODx) / (OD3)							p-value of Abundance Ratio (ODx) / (OD3)
	OD1	OD2	OD3	OD4	OD5			OD1	OD2	OD3	OD4	OD5
VipA	0.375	0.602	1	1.555	0.742		VipA	1.54093e-05	1.75425e-07		0.040149	0.656997
RocC	4.81	1.657	1	0.955	0.544		RocC	3.21903e-11	2.30277e-05		0.73484	0.455695
[truncated: 32 more columns]
