# Supplementary material for: Dual Control of Host Actin Polymerization by a Legionella Effector Pair
Source: Hindawi journal article supplement (doi:10.1155/2024/8896219), 2024-01-27
Supplement: f1 [file 8896219.f1.zip › supplemental 20240125.pdf]

## Dual control of host actin polymerization by a *Legionella* effector pair

### Authors

M. Pillon<sup>1</sup>, C. Michard<sup>1#</sup>, N. Baillo<sup>1#</sup>, J. Bougnon<sup>1,2</sup>, K. Picq<sup>3</sup>, O. Dubois<sup>1</sup>, C. Andrea<sup>1</sup>, L. Attaiech<sup>3</sup>, V. Daubin<sup>2</sup>, S. Jarraud<sup>1</sup>, E. Kay<sup>1</sup>, P. Doublet<sup>1\*</sup>

### SUPPLEMENTAL DATA LEGENDS

**Supplementary Data S1 – List of all cells, bacteria strains used in this study.**

**Supplementary Data S2 – List of plasmids used in this study.**

**Supplementary Data S3 – List of oligonucleotides used to realize mutant strains of *Legionella* as well as for cloning.**

**Supplementary Data S4 – Accession numbers of genomes used for evolutionary analyses.**

**Supplementary Data S5 – Fasta files of sequencing data of  $\Delta legK2$  and  $\Delta legK2/\Delta vipA$  *Legionella pneumophila* strains**

**Supplementary Data S6 – LegK2 and VipA mutations do not alter axenic growth of *L. pneumophila* Paris strains.** Axenic growth kinetics of *L. pneumophila* Paris WT,  $\Delta dotA$ ,  $\Delta legK2$ ,  $\Delta vipA$ ,  $\Delta legK2/\Delta vipA$ , mutant strains transformed with mCherry-expressing plasmids. AYE broth was seeded with  $0.1 \times 10^9$  bacteria/mL and then plated in a 96well-Greiner plate, with black wells and transparent flat bottom. OD<sub>600nm</sub> absorbance was measured every 30min at 595 nm on an Infinite M200 microplate reader (Tecan).

**Supplementary Data S7 – VipA and LegK2 are produced at the onset of the stationary phase in axenic medium at 30°C.** Luminescence emission from chromosomal translational fusions of *vipA::luc(A)* and *legK2::luc(B)* in *L. pneumophila* Paris strain grown in AYE medium at 30°C. Luminescence emission of VipA-Luc and LegK2-Luc fusion proteins is maximal at the onset of the stationary growth phase (growth at 30°C measured by OD<sub>600</sub>, dashed red line), with VipA-Luc slightly ahead of LegK2-Luc. The data shown are representative of 3 independent clones of each fusion.

**Supplementary Data S8 – Mass Spectrometry data following protein expression in *Legionella pneumophila* Paris WT at OD<sub>600nm</sub> 1, 2, 3, 4 and 5.** VipA accumulates in *L. pneumophila* up to OD<sub>600</sub> = 4. Three independent cultures of *L. pneumophila* Paris WT were grown in liquid medium AYE (at 30°C). At the desired OD<sub>600</sub> (1, 2, 3, 4 and 5), samples were collected, and their protein content was analysed by mass spectrometry after sample-specific labelling (see Material and methods for details). The graphs show the quantity detected at each OD<sub>600</sub> or as a ratio compared to the quantity at OD<sub>600</sub>. The RocC protein is used as a control as it is detected at the same range of quantity as VipA and its production during growth was previously studied by Western-blot<sup>23</sup>. Of note the RocC pattern of production detected by mass spectrometry corresponds to the one previously obtained by Western-blot<sup>23</sup>.

**Supplementary Data S9 - LegK2/VipA effector pairs are restricted and strongly conserved in the *L. pneumophila* species.** Phylogenetic tree representing the phylogenetic diversity of *Legionella* genomes displaying either LegK2 (blue green squares) or VipA genes (purple squares). The squares are filled when the genes have been found in corresponding genome and empty when genes have not been detected.

#### SUPPLEMENTARY DATA

| Strains                                |                                                                                                                            |                                   |
|----------------------------------------|----------------------------------------------------------------------------------------------------------------------------|-----------------------------------|
| Names                                  | Genotypes                                                                                                                  | References                        |
| <b><i>Dictyostelium discoideum</i></b> |                                                                                                                            |                                   |
| DBS0236184                             | Calnexin-GFP                                                                                                               | Müller-Taubenberger et al. (2001) |
| DBS0235534                             | Ax2-214                                                                                                                    | Watts & Ashworth, (1970)          |
| <b><i>Acanthamoeba castellanii</i></b> |                                                                                                                            |                                   |
| Environmental isolate                  |                                                                                                                            |                                   |
| <b>Mammalian cells</b>                 |                                                                                                                            |                                   |
| HeLa cells                             |                                                                                                                            | Inserm U1111, Lyon, France        |
| U937                                   | Human monocytes ATCC CRL1593.2                                                                                             | Sundstrom et al. (1976)           |
| <b><i>Legionella pneumophila</i></b>   |                                                                                                                            |                                   |
| WT                                     | Virulent <i>L. pneumophila</i> strain Paris CIP 107629                                                                     | Cazalet et al. (2004)             |
| $\Delta dotA$                          | Paris <i>lpp2740::Km</i>                                                                                                   | Cazalet et al. (2004)             |
| $\Delta legK2$                         | Paris $\Delta lpp2076$ (scar-free deletion of <i>lpp2076</i> )                                                             | This study                        |
| $\Delta vipA$                          | Paris $\Delta lpp0457$ (scar-free deletion of <i>lpp0457</i> )                                                             | This study                        |
| $\Delta legK2\Delta vipA$              | Paris $\Delta lpp2076 \Delta lpp0457$ (scar-free deletion of <i>lpp2076</i> and <i>lpp0457</i> )                           | This study                        |
| <i>legK2::luc</i>                      |                                                                                                                            | This study                        |
| <i>vipA::luc</i>                       |                                                                                                                            | This study                        |
| <i>legK2::gfp</i>                      |                                                                                                                            | This study                        |
| <b><i>Escherichia coli</i></b>         |                                                                                                                            |                                   |
| DH5 $\alpha$                           | <i>endA1 hsdR17 supE4, thi-1 recA1 gyrArelA, <math>\Delta lac</math></i>                                                   | Laboratory                        |
| BL21                                   | <i>B dcmompThsdS(rB-mB-) gal</i>                                                                                           | Laboratory                        |
| XL1 Blue                               | <i>endA1 gyrA96(nalR) thi-1 recA1 relA1 lac glnV44 F'[J/Tn10 proAB+ lacIq<math>\Delta(lacZ)</math>M15] hsdR17(rK- mK+)</i> | Stratagene                        |

#### SUPPLEMENTARY DATA S1

| Plasmids                                               |                                                                                                                                                                     |                            |
|--------------------------------------------------------|---------------------------------------------------------------------------------------------------------------------------------------------------------------------|----------------------------|
| Names                                                  | Characteristics                                                                                                                                                     | References                 |
| Donor vectors for Gateway cloning                      |                                                                                                                                                                     |                            |
| pDONR <sup>TM</sup> 207                                | Donor Gateway vector                                                                                                                                                | Invitrogen                 |
| pDONR <sup>TM</sup> 207- <i>vipA</i>                   | Donor Gateway vector with insertion of lpp0457 gene                                                                                                                 | This study                 |
| Mammalian cells expression vectors for Gateway cloning |                                                                                                                                                                     |                            |
| pDEST27                                                | Expression Gateway vector for mammalian cells allowing overexpression of GST-tagged protein                                                                         | Invitrogen                 |
| pDEST27- <i>legK2</i>                                  | pDEST27 with insertion of lpp2076 gene for expression of GST-LegK2 fusion protein                                                                                   | This study                 |
| pDEST27- <i>legK2</i> <sub>K112M</sub>                 | pDEST27 with insertion of lpp2076 gene for expression of GST-LegK2 <sub>K112M</sub> dead kinase-mutant fusion protein                                               | This study                 |
| pCI-Neo3Flag                                           | Expression Gateway vector for mammalian cells allowing overexpression of Flag-tagged protein                                                                        | Invitrogen                 |
| pCI-Neo3Flag- <i>ArpC1b</i>                            | pCI-Neo3Flag with insertion of ARPC1B human gene for expression of Flag-ARPC1B fusion protein                                                                       | (Michard et al. 2015)      |
| peGFP-Nterm                                            | Expression Gateway vector for mammalian cells allowing overexpression of Nterminal GFP-tagged protein                                                               | INSERM U1111, Lyon, France |
| peGFP-Cterm                                            | Expression Gateway vector for mammalian cells allowing overexpression of Nterminal GFP-tagged protein                                                               | INSERM U1111, Lyon, France |
| peGFP-N- <i>vipA</i>                                   | peGFP-Nterm with insertion of lpp0457 gene for expression of VipA-GFP fusion protein                                                                                | This study                 |
| peGFP-C- <i>vipA</i>                                   | peGFP-Cterm with insertion of lpp0457 gene for expression of GFP-VipA fusion protein                                                                                | This study                 |
| Bacteria expression vectors                            |                                                                                                                                                                     |                            |
| pXDC50                                                 | Expression plasmid for <i>L. pneumophila</i> allowing expression of mCherry fluorescent protein                                                                     | (Hervet et al. 2011)       |
| pXDC50-lpp2076                                         | Expression plasmid for <i>L. pneumophila</i> allowing inducible expression of mCherry fluorescent protein and expression of LegK2 under control of its own promoter | This study                 |
| pXDC61                                                 | Expression plasmid for <i>L. pneumophila</i> allowing overexpression of $\beta$ -Lactamase                                                                          | Charpentier et al. (2009)  |
| pXDC61- <i>legK2</i>                                   | Expression plasmid for <i>L. pneumophila</i> allowing overexpression of $\beta$ -Lactamase-LegK2 fusion protein                                                     | This study                 |
| pXDC61- <i>vipA</i>                                    | Expression plasmid for <i>L. pneumophila</i> allowing overexpression of $\beta$ -Lactamase-VipA fusion protein                                                      | This study                 |
| pGEX- <i>legK2</i>                                     | Overproduction and <i>in vitro</i> purification of GST-LegK2                                                                                                        | This study                 |
| pQE30- <i>vipA</i>                                     | Overproduction and <i>in vitro</i> purification of GST-LegK2                                                                                                        | This study                 |

## SUPPLEMENTARY DATA S2

| Primers                      |                                                         |                                                                              |
|------------------------------|---------------------------------------------------------|------------------------------------------------------------------------------|
| Names                        | Sequences                                               | Description                                                                  |
| 1_vipA fwd                   | GGGGACAAGTTTGTACAAAAAAGCAGGCTTAatgcctatcagtaatgcc ttt   | vipA insertion in pDONR207 vector for peGFP-C-VipA                           |
| 2_vipA rev                   | GGGGACCACTTTGTACAAGAAAGCTGGGTTgagatttttttttcgacggt agtg |                                                                              |
| 3_vipA fwd                   | GGGGACCACTTTGTACAAGAAAGCTGGGTTgagatttttttttcgacggt agtg | vipA insertion in pDONR207 vector for peGFP-N-VipA                           |
| 4_vipA rev                   | GGGGACCACTTTGTACAAGAAAGCTGGGTTgagatttttttttcgacggt agtg |                                                                              |
| 5_legK2 fwd                  | attggggaagcgggtaccggggtttattacataaattgaagga             | legK2 insertion in pXDC61 vector in XmaI site                                |
| 6_legK2 rev                  | tatctagaggatccccgggttttagcttgggcctcgcat                 |                                                                              |
| 7_vipA fwd                   | cattggggaagcgggtaccgggctatcagtaatgccttcttaa             | vipA insertion in pXDC61 vector in XmaI site                                 |
| 8_vipA rev                   | tatctagaggatccccggctagagatttttttttcgacggta              |                                                                              |
| 9_P1 vipA                    | TTCAACTCATCCTAGCATTG                                    | vipA inactivation in <i>Legionella</i> by KanMazF technique                  |
| 10_P2 vipA                   | CAGCAATATGATATTCTGGC                                    |                                                                              |
| 11_P3 vipA                   | GGCCCAATTCGCCCTATAGTGAGTCGATGGATGGTCAAGCATTAT C         |                                                                              |
| 12_P4 vipA                   | GGGTTTGCTCGGGTCGGTGGCATATGGTGCTCTATGATACTGACA TC        |                                                                              |
| 13_P5 vipA                   | GATGTCAGTACATAGAGCACATGGATGGTCAAGCATTATC                |                                                                              |
| 14_P6 vipA                   | GATAATGCTTGACCATCCATGTGCTCTATGATACTGACATC               | legK2 inactivation in <i>Legionella</i> by KanMazF technique                 |
| 19_P1 legK2                  | TTACCAATGTAATGAGACATCG                                  |                                                                              |
| 20_P2 legK2                  | GGCCCAATTCGCCCTATAGTGAGTCGtcttgaggtagaggtgttcc          |                                                                              |
| 21_P3 legK2                  | GGGTTTGCTCGGGTCGGTGGCATATGCTGCAAATCAAGATAAGCA ACC       |                                                                              |
| 22_P4 legK2                  | ATAGCATGCACAACCTTTGATATCAAGCATCC                        |                                                                              |
| 23_P5 legK2                  | GGTTGCTTATCTTGATTTGCAGtcttgaggtagaggtgttcc              |                                                                              |
| 24_P6 legK2                  | GGAACAACCTCTACCTCAAGACTGCAAATCAAGATAAGCAACC             |                                                                              |
| vipA linker REV              | GCTGCCCCACCTCCGAGATTTTTTTTTTCGACGGTAGTG                 | Insertion of gene <i>luc</i> for translational fusion by kanMazF technique   |
| luc REV                      | CAATTTGGGCTTTCCGCCCTTC                                  |                                                                              |
| pLLA01_TRAD FW               | GGAGGTGGGGGAGCAGATCCGCCAAAAAC ATAAAGAAAGG               |                                                                              |
| lpp0457 trad after luc       | GAAGGGCGGAAAGCCCAAATTGTAGTTCAGCCAATTTCTGTTC             |                                                                              |
| legK2linker REV              | GCTGCCCCACCTCCCTTGGGCCTCGCATCAATGAAG                    |                                                                              |
| legK2 fusion luc after       | GAAGGGCGGAAAGCCCAAATTGTAAAAAACGTCACTGAAGTGTT AG         | Insertion of gene <i>sfGFP</i> for translational fusion by kanMazF technique |
| SD ATG lpp2076               | CATAATGCTCTCTATAAGCC                                    |                                                                              |
| SD ATG lpp2076 SfGFP         | GGCTTATAGGAGAGCATTATGTCTAAAGGTGAAGAACTGTTC              |                                                                              |
| Comp start lpp2076-end sfGFP | CTTCAAATTTATGTAATAAACTTTGTAGAGCTCATCCATGCC              |                                                                              |
| start lpp2076                | GTTTATTACATAAATTTGAAG                                   |                                                                              |
| 25_Fwd pGEX                  | GGGCCCCTGGAACAGAAC                                      | Construction of pGEX-legK2 plasmid by PCR SLIC                               |
| 26_Rev pGEX                  | CTGGGATCCCCGAATTCCC                                     |                                                                              |
| 27_Fwd legK2 pGEX            | GTTCTGTTCCAGGGGCCGttttattacataaattgaaggaac              |                                                                              |
| 28_Rev legK2 pGEX            | GGGAATTCGGGGATCCAGttagcttgggcctcgcatc                   | Construction of pQE30-vipA plasmid by BamHI digestion SLIC                   |
| 31_Fwd vipA pQE30            | GCTCGCATGCGGATCctagagatttttttttcgacggtag                |                                                                              |
| 32_Rev vipA pQE30            | TCACCATCACGGATCccctatcagtaatgccttcttaagtt               |                                                                              |

#### SUPPLEMENTARY DATA S3

| Accession #    | Strain names                             | Accession #    | Strain names                                                 |
|----------------|------------------------------------------|----------------|--------------------------------------------------------------|
| GCF000621365.1 | <i>L. geestiana</i> DSM 21217            | GCF001468085.1 | <i>L. waltersii</i> ATCC51914                                |
| GCF001467645.1 | <i>L. geestiana</i> ATCC49504            | GCF900187095.1 | <i>L. waltersii</i> NCTC13017                                |
| GCF001468165.1 | <i>L. spiritensis</i> Mt.St.Helens-9     | GCF000770585.1 | <i>L. norrlandica</i> LEGN                                   |
| GCF900186965.1 | <i>L. spiritensis</i> NCTC11990          | GCF001582625.1 | <i>L. pneumophila</i> FS_4_1103abu                           |
| GCF001467615.1 | <i>L. erythra</i> SE-32A-C8              | GCF000586195.1 | <i>L. pneumophila</i> subsp. fraseri ATCC35251               |
| GCF001468125.1 | <i>L. rubrilucens</i> WA-270A-C2         | GCF000586315.1 | <i>L. pneumophila</i> subsp. fraseri ATCC33156               |
| GCF001467505.1 | <i>L. birminghamensis</i> CDC#1407-AL-14 | GCF001639045.1 | <i>L. pneumophila</i> PtVFX/2014                             |
| GCF001467975.1 | <i>L. quinlivanii</i> CDC#1442-AUS-E     | GCF001582535.1 | <i>L. pneumophila</i> SZ069                                  |
| GCF001467025.1 | <i>L. brunensis</i> ATCC43878            | GCF001886835.1 | <i>L. pneumophila</i> subsp. fraseri Dallas 1E               |
| GCF000953655.1 | <i>L. hackeliae</i> ATCC35250            | GCF001582295.1 | <i>L. pneumophila</i> SZ099                                  |
| GCF001467705.1 | <i>L. hackeliae</i> 798-PA-H             | GCF001886795.1 | <i>L. pneumophila</i> subsp. fraseri Detroit-1               |
| GCF002240035.1 | <i>L. clemsonensis</i> CDC-D5610         | GCF001583645.1 | <i>L. pneumophila</i> SZ026                                  |
| GCF001691475.1 | <i>L. jamestowniensis</i> 974010_12      | GCF001600905.1 | <i>L. pneumophila</i> NY24                                   |
| GCF001467745.1 | <i>L. jamestowniensis</i> JA-26-G1-E2    | GCF000586255.1 | <i>L. pneumophila</i> subsp. pascullei ATCC33737             |
| GCF900187355.1 | <i>L. Lansingensis</i> NCTC12830         | GCF001582645.1 | <i>L. pneumophila</i> WD_4_1102b-36                          |
| GCF001467795.1 | <i>L. Lansingensis</i> ATCC49751         | GCF000953935.1 | <i>L. pneumophila</i> Ymt294                                 |
| GCF001467765.1 | <i>L. jordanis</i> BL-540                | GCF001582405.1 | <i>L. pneumophila</i> FS_10_1101a-3                          |
| GCF001648675.1 | <i>L. jordanis</i> ATCC33623             | GCF000092625.1 | <i>L. pneumophila</i> 2300/99 Alcoy                          |
| GCF000308315.1 | <i>L. tunisiensis</i> LegM               | GCF000092545.1 | <i>L. pneumophila</i> str. Corby                             |
| GCF001467625.1 | <i>L. feeleeii</i> WO-44C                | GCF000823425.1 | <i>L. pneumophila</i> 12_4117                                |
| GCF001648615.1 | <i>L. feeleeii</i> ATCC35072             | GCF000586095.1 | <i>L. pneumophila</i> subsp. <i>pneumophila</i> ATCC43703    |
| GCF000621525.1 | <i>L. fairfieldensis</i> ATCC49588       | GCF001582385.1 | <i>L. pneumophila</i> SH135                                  |
| GCF000756695.1 | <i>L. massiliensis</i>                   | GCF900063795.1 | <i>L. pneumophila</i> 2531STDY5467313                        |
| GCF000756815.1 | <i>L. massiliensis</i> LegA              | GCF000586075.1 | <i>L. pneumophila</i> subsp. <i>pneumophila</i> ATCC43736    |
| GCF001467585.1 | <i>L. drozanskii</i> ATCC700990          | GCF001592705.1 | <i>L. pneumophila</i> subsp. <i>pneumophila</i> Toronto-2005 |
| GCF001467895.1 | <i>L. nautarum</i> ATCC49506             | GCF900119765.1 | <i>L. pneumophila</i> ST62                                   |
| GCF900167045.1 | <i>L. maceachernii</i> ATCC35300         | GCF900053665.1 | <i>L. pneumophila</i> 2531STDY5467288                        |
| GCF002085735.1 | <i>T. micdadei</i> NZ2016                | GCF900119755.1 | <i>L. pneumophila</i> ST23                                   |
| GCF002085715.1 | <i>T. micdadei</i> NZ2015                | GCF000048645.1 | <i>L. pneumophila</i> str. Paris                             |
| GCF001467055.1 | <i>L. adelaidensis</i> 1762-AUS-E        | GCF001583655.1 | <i>L. pneumophila</i> SH003                                  |
| GCF001467825.1 | <i>L. londiniensis</i> ATCC 49505        | GCF900060375.1 | <i>L. pneumophila</i> 2531STDY5467394                        |
| GCF000512715.1 | <i>L. oakridgensis</i> RV-2-2007         | GCF000695015.1 | <i>L. pneumophila</i> TUM 13948                              |
| GCF001648605.1 | <i>L. oakridgensis</i> ATCC 33761        | GCF001582555.1 | <i>L. pneumophila</i> TL-12                                  |
| GCF001467785.1 | <i>L. israelensis</i> Bercovier 4        | GCF000586235.1 | <i>L. pneumophila</i> subsp. <i>pneumophila</i> ATCC33823    |
| GCF000162755.2 | <i>L. drancourtii</i> LLAP12             | GCF000950745.1 | <i>L. pneumophila</i> Twr292                                 |
| GCF001465875.1 | <i>L. saoudiensis</i> LH-SWC             | GCF001582225.1 | <i>L. pneumophila</i> ATCC35096                              |
| GCF001467695.1 | <i>L. gratiana</i> Lyon 8420412          | GCF000306865.1 | <i>L. pneumophila</i> subsp. <i>pneumophila</i> Lorraine     |
| GCF001467545.1 | <i>L. cincinnatiensis</i> CDC#72-OH-14   | GCF900050185.1 | <i>L. pneumophila</i> 2531STDY5467306                        |
| GCF001468135.1 | <i>L. santicrucis</i> SC-63-C7           | GCF001582215.1 | <i>L. pneumophila</i> ATCC43130                              |

|                |                                       |                |                                                                     |
|----------------|---------------------------------------|----------------|---------------------------------------------------------------------|
| GCF000621685.1 | <i>L. sainthelensi</i> ATCC35248      | GCF001601075.1 | <i>L. pneumophila</i> NY27                                          |
| GCF001468105.1 | <i>L. sainthelensi</i> Mt.St.Helens-4 | GCF900062515.1 | <i>L. pneumophila</i> 2531STDY5467417                               |
| GCF000091785.1 | <i>L. longbeachae</i> NSW150          | GCF000048665.1 | <i>L. pneumophila</i> str. Lens                                     |
| GCF000176095.1 | <i>L. longbeachae</i> D-4968          | GCF000586355.1 | <i>L. pneumophila</i> subsp. <i>pneumophila</i> ATCC33154           |
| GCF000701265.1 | <i>L. wadsworthii</i> ATCC33877       | GCF001582565.1 | <i>L. pneumophila</i> ATCC33154                                     |
| GCF001467945.1 | <i>L. parisiensis</i> PF-209-C-C2     | GCF900057235.1 | <i>L. pneumophila</i> 2531STDY5467316                               |
| GCF001736145.1 | <i>L. parisiensis</i> DSM 19216       | GCF900092465.1 | <i>L. pneumophila</i> Lpm7613                                       |
| GCF001468035.1 | <i>L. tucsonensis</i> ATCC49180       | GCF001753125.1 | <i>L. pneumophila</i> C11_O                                         |
| GCF000333755.1 | <i>L. anisa</i> Linanissette          | GCF001752705.1 | <i>L. pneumophila</i> E10_P                                         |
| GCF002082905.1 | <i>L. anisa</i> FDAARGOS_200          | GCF001753265.1 | <i>L. pneumophila</i> E2_N                                          |
| GCF001468065.1 | <i>L. steigerwaltii</i> SC-18-C9      | GCF000008485.1 | <i>L. pneumophila</i> subsp. <i>pneumophila</i> str. Philadelphia 1 |
| GCF000621385.1 | <i>L. cherrii</i> DSM 19213           | GCF001601055.1 | <i>L. pneumophila</i> NY17                                          |
| GCF001467035.1 | <i>L. cherrii</i> ORW                 | GCF900058585.1 | <i>L. pneumophila</i> 2532STDY5467522                               |
| GCF001468005.1 | <i>L. steelei</i> IMVS3376            | GCF900062435.1 | <i>L. pneumophila</i> 2532STDY5467504                               |
| GCF000953135.1 | <i>L. fallonii</i> LLAP-10            | GCF900062395.1 | <i>L. pneumophila</i> 2532STDY5467530                               |
| GCF000373765.1 | <i>L. shakespearei</i> DSM 23087      | GCF000823645.1 | <i>L. pneumophila</i> 12_4904                                       |
| GCF001468025.1 | <i>L. shakespearei</i> ATCC49655      | GCF900055205.1 | <i>L. pneumophila</i> 2532STDY5467502                               |
| GCF001467535.1 | <i>L. worsleiensis</i> ATCC49508      | GCF900062385.1 | <i>L. pneumophila</i> 2532STDY5467524                               |
| GCF000423305.1 | <i>L. moravica</i> DSM 19234          | GCF900053395.1 | <i>L. pneumophila</i> 2532STDY5467482                               |
| GCF001467865.1 | <i>L. moravica</i> ATCC43877          | GCF000826165.1 | <i>C. burnetii</i> Cb171_QLYMPHOMA                                  |
| GCF001467955.1 | <i>L. quateirensis</i> ATCC49507      | GCF000019865.1 | <i>C. burnetii</i> CbuG_Q212                                        |

## SUPPLEMENTARY DATA S4

Fasta files of sequencing data of  $\Delta legK2$  and  $\Delta legK2/\Delta vipA$  *Legionella pneumophila* strains - RNA-seq and sequencing data have been deposited in European Nucleotide Archive database at EMBL-EBI (<https://www.ebi.ac.uk/ena>) under accession number PRJEB62121.

## Supplementary Data S5

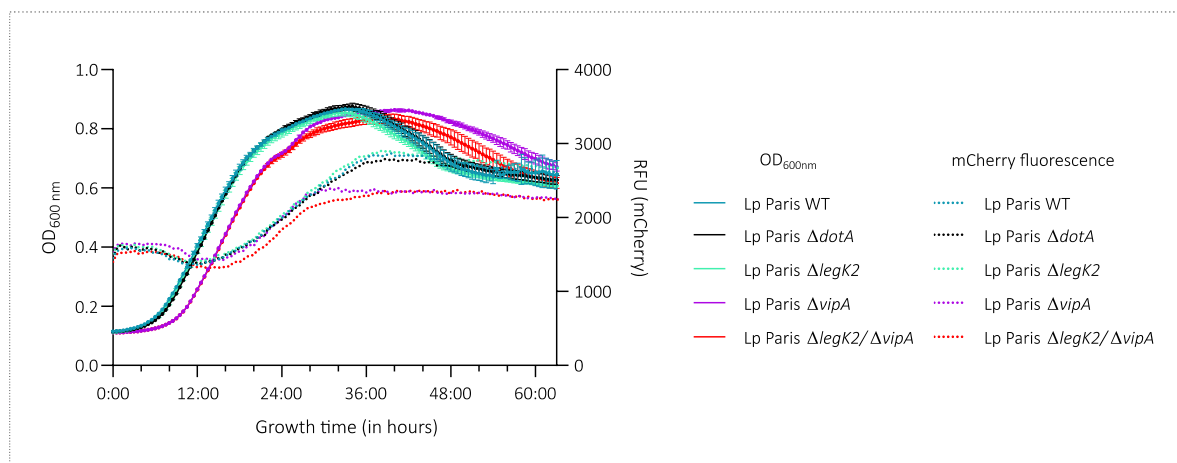

## SUPPLEMENTARY DATA S6

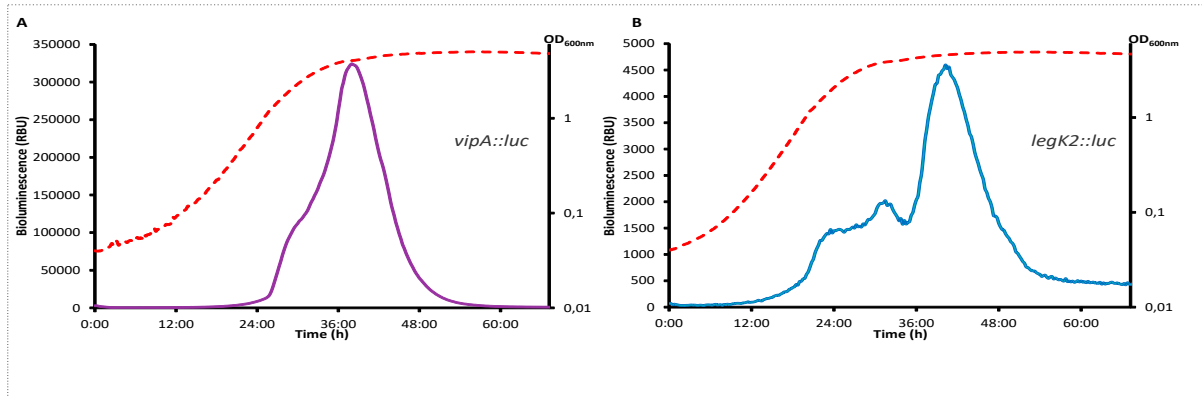

## SUPPLEMENTARY DATA S7

■ LegK2

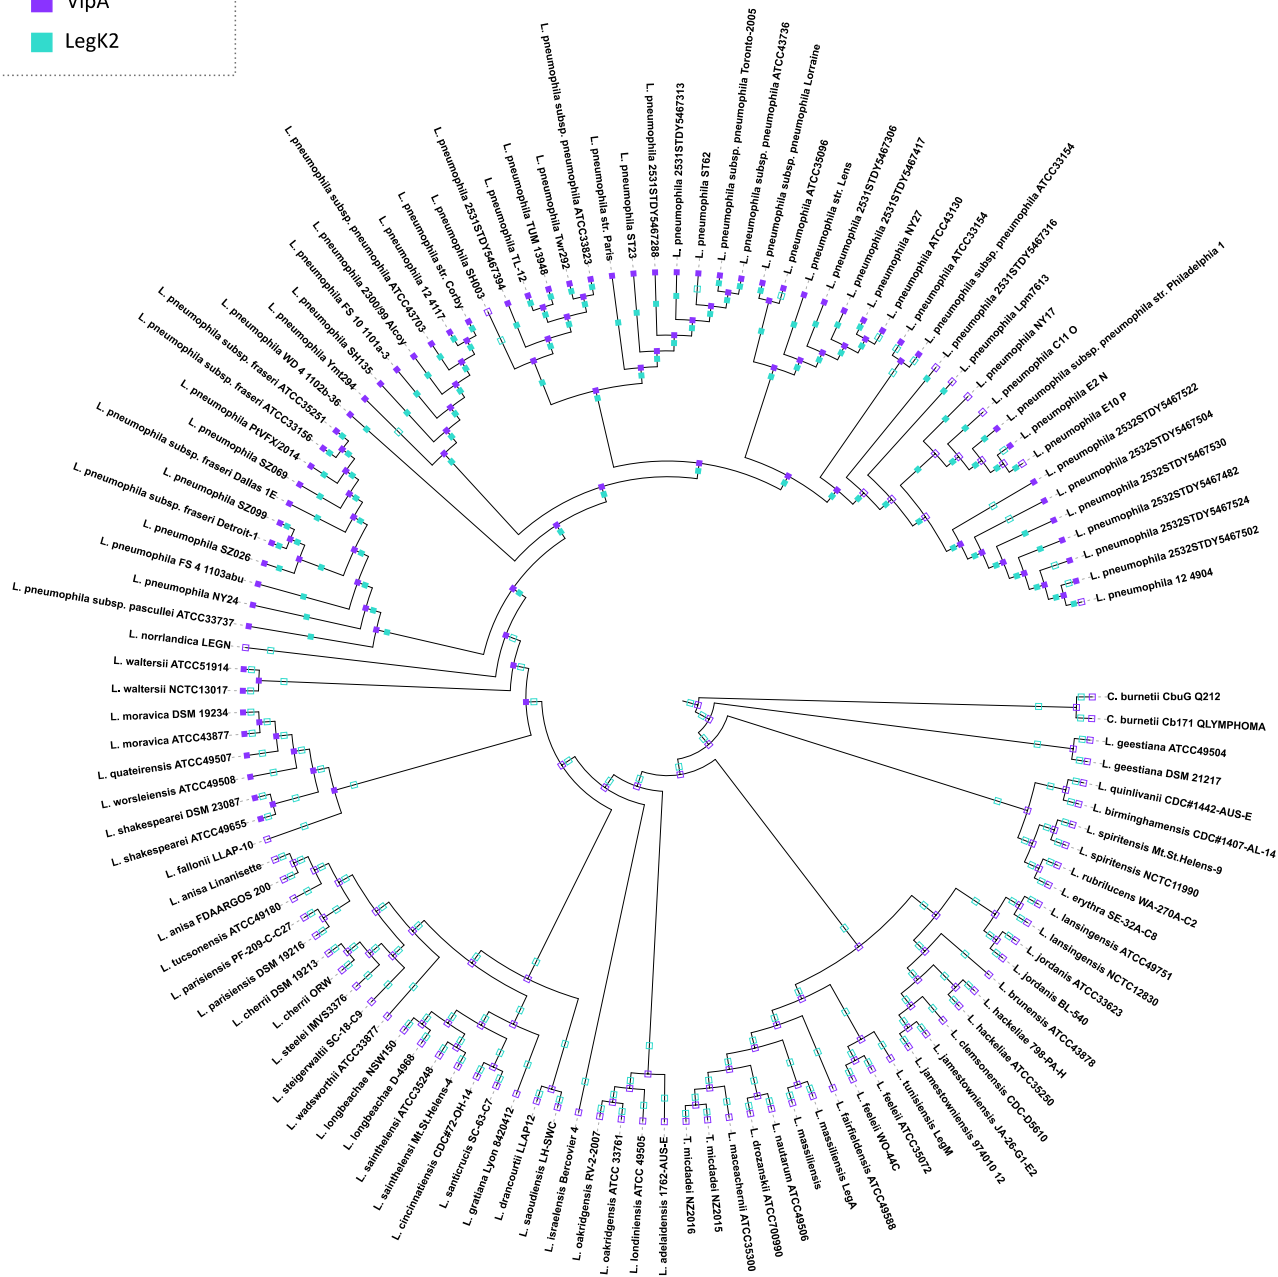

9
